# Supplementary material
Source: MDPI journal article supplement (https://www.mdpi.com/2311-5637/10/3/161)
Supplement: s1 [file s1]

**Table S1.** Component of banana peel.\*

| Component          | Content (g/100 g)  |
|--------------------|--------------------|
| Organic compound   |                    |
| Cellulose          | 15.6 ± 0.965       |
| Hemicellulose      | 13.8 ± 0.755       |
| Lignin             | 9.44 ± 0.750       |
| Pectin             | 12.9 ± 0.130       |
| Crude protein      | 5.94 ± 0.735       |
| Carbohydrate       | 22.9 ± 3.36        |
| Sugar              | 9.99 ± 1.52        |
| Inorganic compound |                    |
| Ash                | 13.1 ± 0.700       |
| Potassium          | 5.71 ± 1.89        |
| Phosphorus         | 0.786 ± 0.561      |
| Calcium            | 0.351 ± 0.111      |
| Magnesium          | 0.162 ± 0.0231     |
| Iron               | 0.0418 ± 0.00594   |
| Sodium             | 0.0352 ± 0.0197    |
| Zink               | 0.00168 ± 0.000125 |
| Manganese          | 0.00136 ± 0.000110 |

\*The contents were calculated based on data from Ragab et al [\[10\]](#).
